# Supplementary material for: Structural and Dynamical Insights into the Membrane-Bound α-Synuclein
Source: PubMed Central journal article supplement (PMC3869795; doi:10.1371/journal.pone.0083752), 2013-12-20

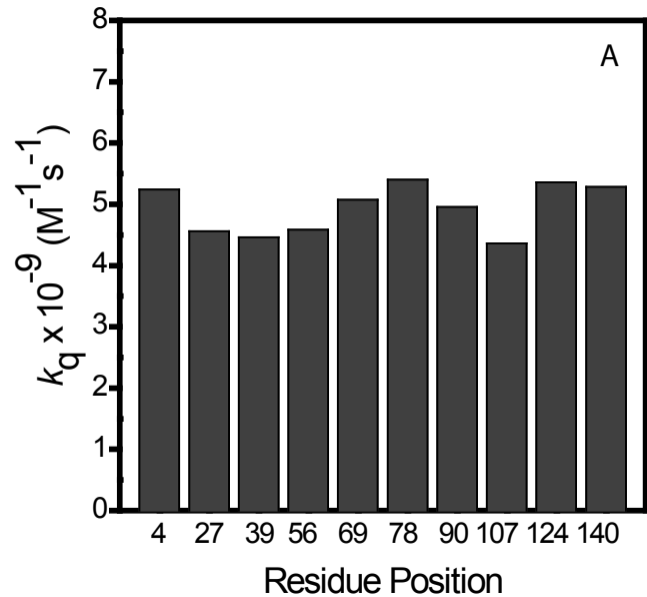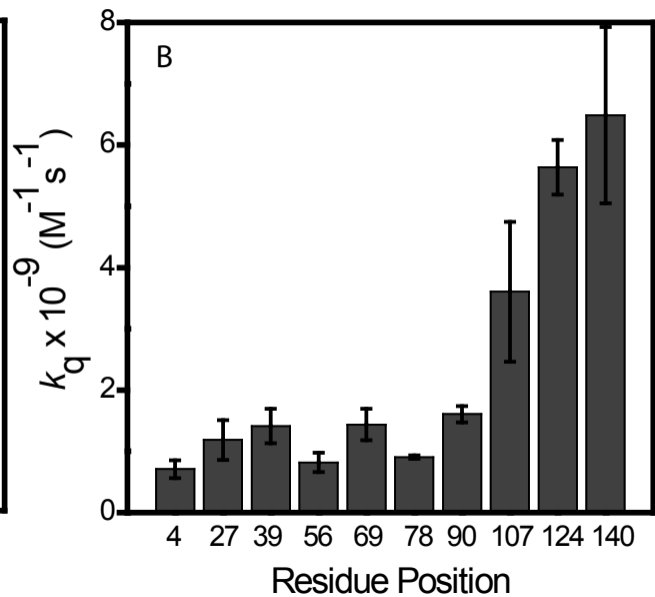

Supplement: pone.0083752.s003.pdf [file pone.0083752.s003.pdf]
