# Supplementary material for: Structural and Dynamical Insights into the Membrane-Bound α-Synuclein
Source: PubMed Central journal article supplement (PMC3869795; doi:10.1371/journal.pone.0083752), 2013-12-20
Supplement: pone.0083752.s007.pdf [file pone.0083752.s007.pdf]

**Table S1. Primer sequence for site-directed mutagenesis**

| Mutants | Primer  | Sequence (5'→3')                                 | No. of Bases | T <sub>m</sub> (°C) | % GC |
|---------|---------|--------------------------------------------------|--------------|---------------------|------|
| A69W    | Forward | 5'GACAAATGTTGGAGGAT <b>TGGG</b> TGGTGACG3'       | 28           | 60.1                | 53.6 |
| A69W    | Reverse | 5'CACCCGTCACCACCCATCCTCCAAC3'                    | 25           | 59.7                | 64   |
| A27W    | Forward | 5'CCAAACAGGGTGTGT <b>TGGA</b> AAGCAGCAGG3'       | 28           | 63.7                | 60.7 |
| A27W    | Reverse | 5'GTCTTTCCTGCTGCTTCCACACACCCTG3'                 | 29           | 62.5                | 58.6 |
| A56W    | Forward | 5'GGTGTGGCAACAGTGT <b>TGG</b> GAGAAGACC3'        | 27           | 58.6                | 59.3 |
| A56W    | Reverse | 5'GCTCTTTGGTCTTCTCCACACTGTTGC3'                  | 28           | 57.6                | 53.6 |
| A90W    | Forward | 5'CAGGGAGCATTGCAT <b>TGGG</b> CCACTGGC3'         | 26           | 65.2                | 65.4 |
| A90W    | Reverse | 5'CAAAGCCAGTGGCCCATGCAATGCTCC3'                  | 27           | 64.4                | 59.3 |
| A78W    | Forward | 5'GGTGTGACAGCAGTAT <b>TGG</b> CAGAAGACAG3'       | 28           | 55.3                | 53.6 |
| A78W    | Reverse | 5'CTCCACTGTCTTCTGCCATACTGCTGTC3'                 | 28           | 54.7                | 53.6 |
| A107W   | Forward | 5'GCAAGAATGAAGAAGGAT <b>TGG</b> CCACAGGAAG3'     | 30           | 61                  | 50   |
| A107W   | Reverse | 5'CAGAATTCCTTCTGTGGCCATCCTTCTTC3'                | 30           | 60.3                | 50   |
| A124W   | Forward | 5'GGATCCTGACAATGAG <b>TGG</b> TATGAAATGCC3'      | 30           | 58.1                | 46.7 |
| A124W   | Reverse | 5'CCTCAGAAGGCATTCATACCACTCATTGTC3'               | 31           | 57.8                | 45.2 |
| Y39W    | Forward | 5'GACAAAAGAGGGTGTCTCT <b>TGGG</b> TAGGCTCC3'     | 31           | 60.6                | 54.8 |
| Y39W    | Reverse | 5'GGTTTTGGAGCCTACCCAGAGAACACCC3'                 | 28           | 59.2                | 57.1 |
| F4W     | Forward | 5' CATATGGATGTAT <b>TGG</b> ATGAAAGGAC3'         | 25           | 45.4                | 40   |
| F4W     | Reverse | 5' GTCCTTTCATCCATACATCCATATG3'                   | 25           | 45.4                | 40   |
| A140W   | Forward | 5'GACTATGAACCTGAAT <b>TGG</b> TAAGAAATATCTTTGC3' | 34           | 55                  | 35.3 |
| A140W   | Reverse | 5'GAGCAAAGATATTTCTTACCATTTCAGGTTTCATAG3'         | 34           | 55.1                | 35.3 |
